# Supplementary material
Source: Springer Nature journal article supplement (https://www.springermedizin.de/resource/supplementary/12907_2013_142_MOESM9_ESM.pdf/9524734)

**A**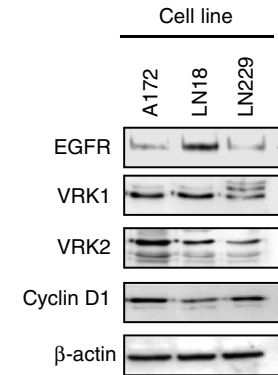

|           |      |     |      |
|-----------|------|-----|------|
| EGFR/VRK1 | 0.48 | 1.0 | 0.55 |
| EGFR/VRK2 | 0.51 | 1.1 | 0.54 |

**B**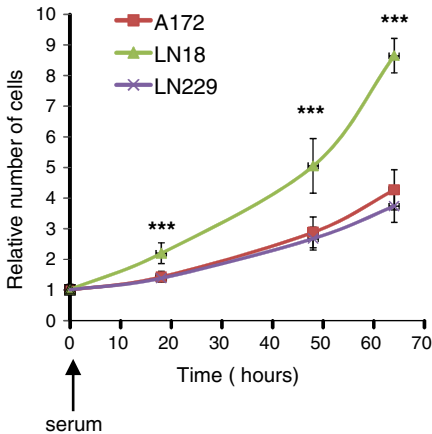

Supplement: MOESM9 [file 9524734]
